# Supplementary material for: GOSI9: UK Global Ocean and Sea Ice configurations
Source: Copernicus journal article supplement (doi:10.5194/egusphere-2024-805), 2024-05-21
Supplement: Supplementary file 1 [file egusphere-2024-805-supplement.pdf]

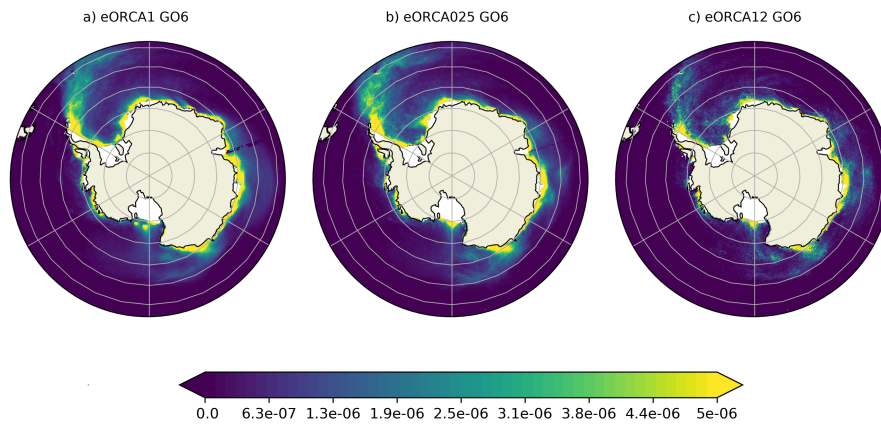

**Figure S1.** Annual mean of fresh water flux ( $\text{kg}\cdot\text{m}^{-2}\cdot\text{s}^{-1}$ ) from iceberg melt calculated from G06 integrations.
